# Supplementary material for: The ketogenic diet increases Neuregulin 1 expression via elevating histone acetylation and its anti-seizure effect requires ErbB4 kinase activity
Source: PubMed Central journal article supplement (PMC8139023; doi:10.1186/s13578-021-00611-7), 2021-05-21

# Supplemental fig. 1

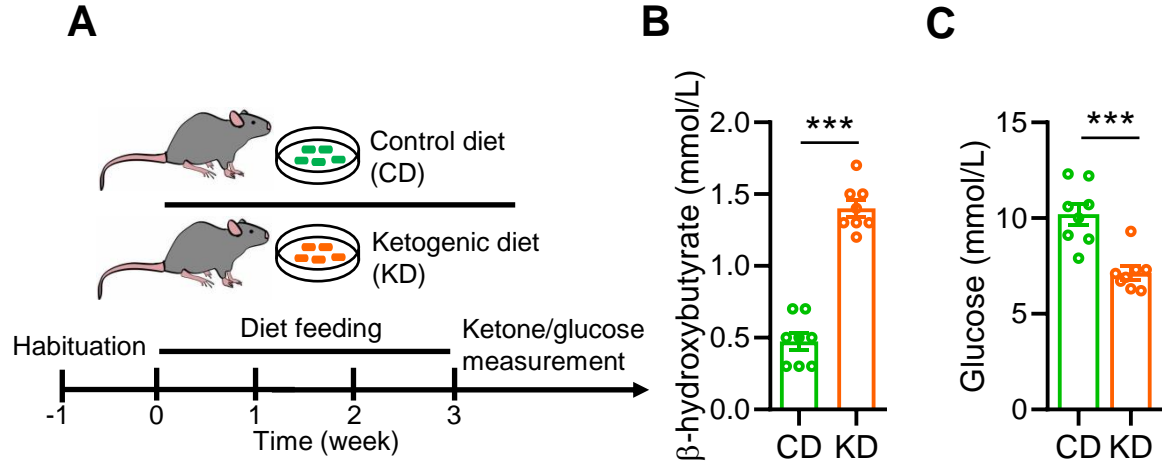

# Supplemental fig. 2

**A**

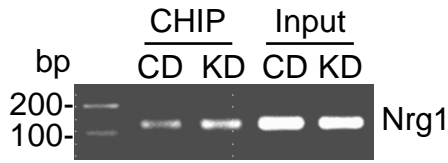

**B**

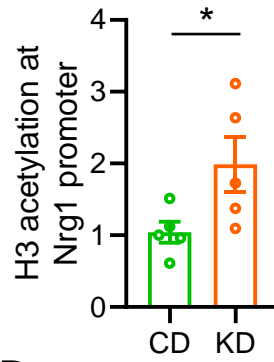

**C**

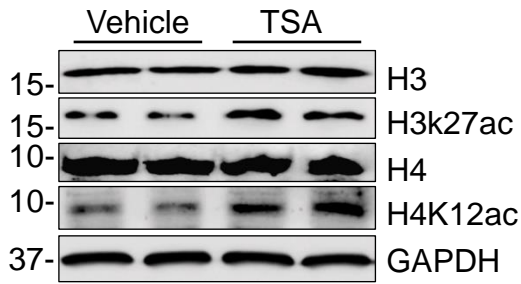

**D**

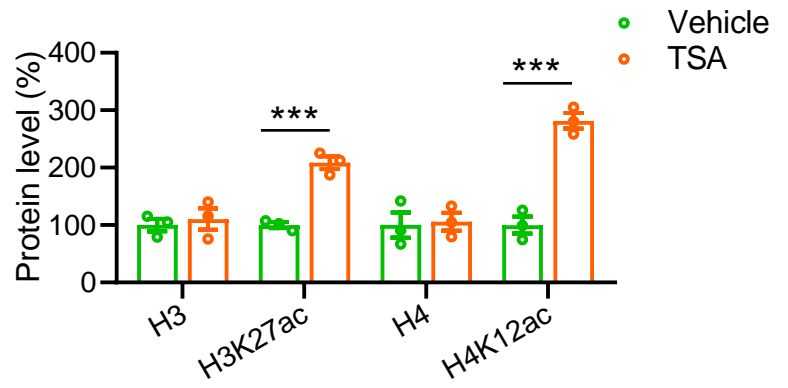

**E**

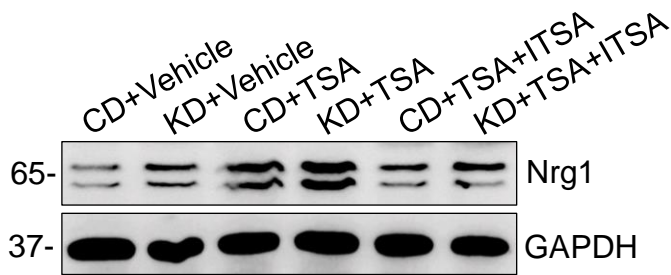

**F**

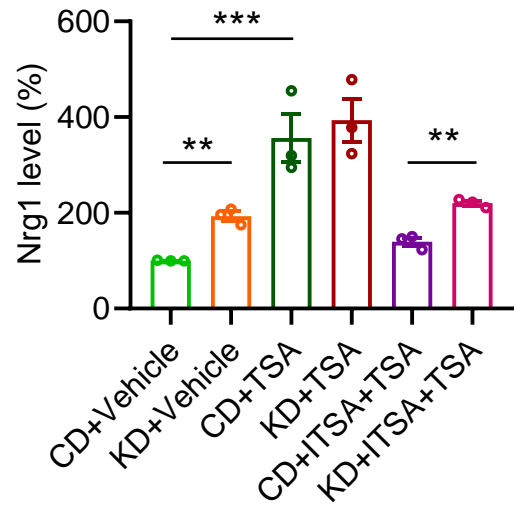

# Supplemental fig. 3

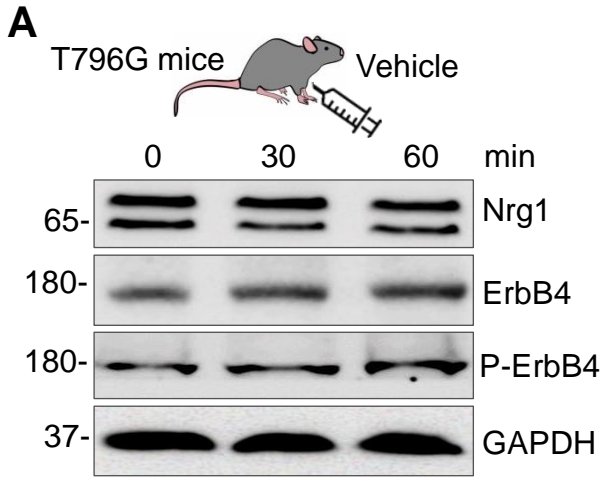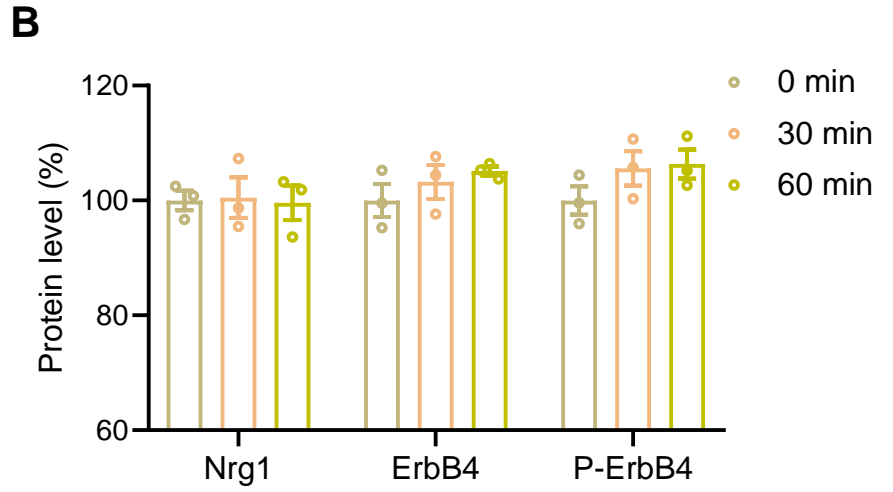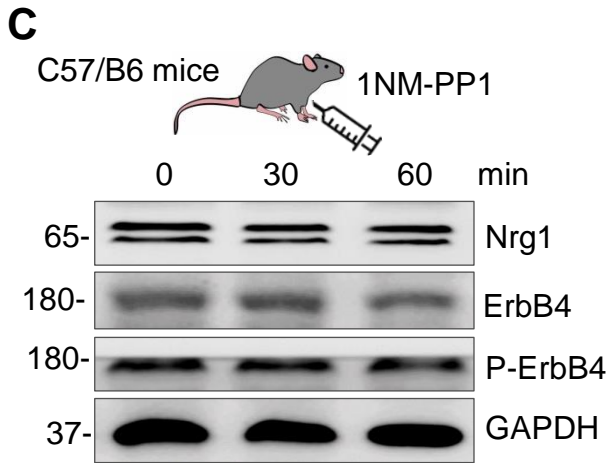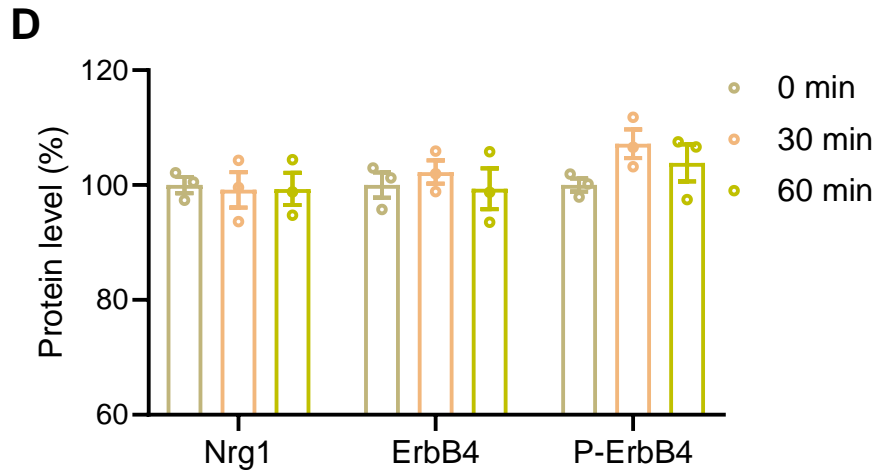

Supplement: 13578_2021_611_MOESM1_ESM.pdf [file 13578_2021_611_MOESM1_ESM.pdf]
